# Supplementary material for: Effective dispersion of aqueous clay suspension using carboxylated nanofibrillated cellulose as dispersant
Source: Royal Society of Chemistry journal article supplement (doi:10.1039/c6ra03935a), 2016-01-01
Supplement: c6ra03935a1.pdf [file c6ra03935a1.pdf]

## Supporting Materials

### Effective dispersion of aqueous clay suspension using carboxylatednanofibrillated cellulose as dispersant

Siyi Ming, Gang Chen, Zhenfu Wu, Linfeng Su, Jiahao He, YudiKuang, Zhiqiang Fang

**Table S1** Average particle size of clay suspension

| Sample                   | Clay suspension (28.3%) | Clay suspension (29.2%) |
|--------------------------|-------------------------|-------------------------|
| D50<br>( $\mu\text{m}$ ) | 2.03                    | 2.53                    |

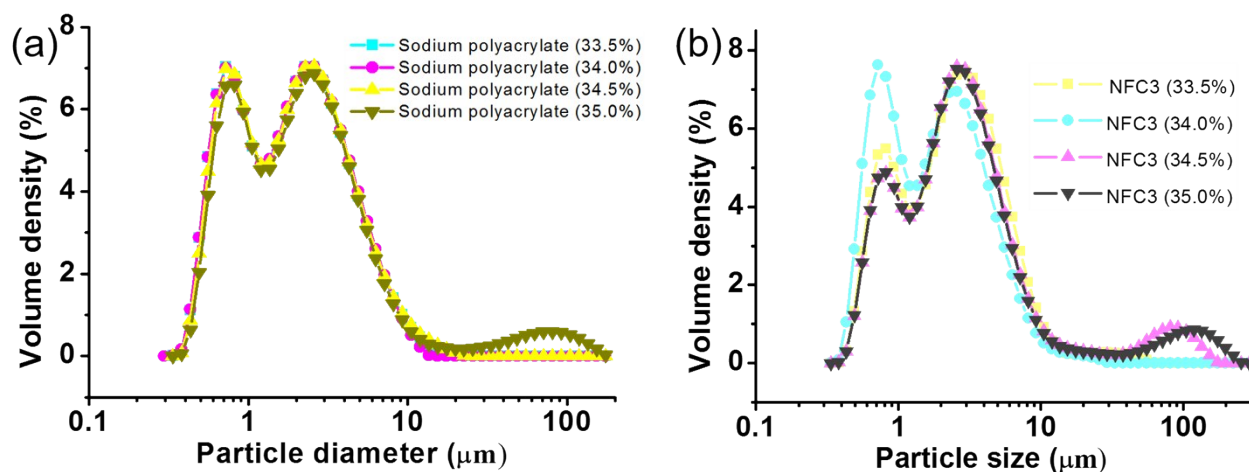

**Figure S1** Particle size distribution of (a) sodium polyacrylate-assisted dispersed clay dispersions and (b) NFC3-assisted dispersed clay dispersions as a function of solid content.

**Table S2** The characteristics of two types of NFC for dispersing clay suspension

| Samples | Carboxylcontent<br>(mmol/g) | Cycles (D10)<br>(5000psi) | Cycles (D4)<br>(20000psi) |
|---------|-----------------------------|---------------------------|---------------------------|
| 3       | 1.157                       | 1                         | 1                         |
| 4       | 0.875                       | 1                         | 1                         |
